# Supplementary material
Source: publisher figshare collection journal article supplement (https://acs.figshare.com/ndownloader/files/30415672)
Supplement: Supplementary file 1 [file 30415672]

## Supporting information

### **Antibacterial Activity and Synergetic Mechanism of Carbon Dots Against Gram-positive and negative Bacterial**

*Jiarong Liang<sup>1</sup>, Wei Li<sup>1,2</sup>, Jianying Chen<sup>1</sup>, Xiaoman Huang<sup>1</sup>, Yingliang Liu<sup>1,2</sup>, Xuejie Zhang<sup>1,2</sup>, Wei Shu<sup>3</sup>, Bingfu Lei<sup>1,2,\*†</sup>, and Haoran Zhang<sup>1,\*†</sup>*

<sup>1</sup> Key Laboratory for Biobased Materials and Energy of Ministry of Education, College of Materials and Energy, South China Agricultural University, Guangzhou 510642, P. R. China

<sup>2</sup> Maoming Branch, Guangdong Laboratory for Lingnan Modern Agriculture, Guangdong Maoming 525100, P. R. China

<sup>3</sup> Instrumental Analysis & Research Centre, South China Agricultural University, Guangzhou 510642, P. R. China

\*Corresponding authors: [tleibf@scau.edu.cn](mailto:tleibf@scau.edu.cn) (Bingfu Lei), [hrzhang@scau.edu.cn](mailto:hrzhang@scau.edu.cn) (Haoran Zhang)

---

\* Corresponding authors: [tleibf@scau.edu.cn](mailto:tleibf@scau.edu.cn) (Bingfu Lei), [hrzhang@scau.edu.cn](mailto:hrzhang@scau.edu.cn) (Haoran Zhang)

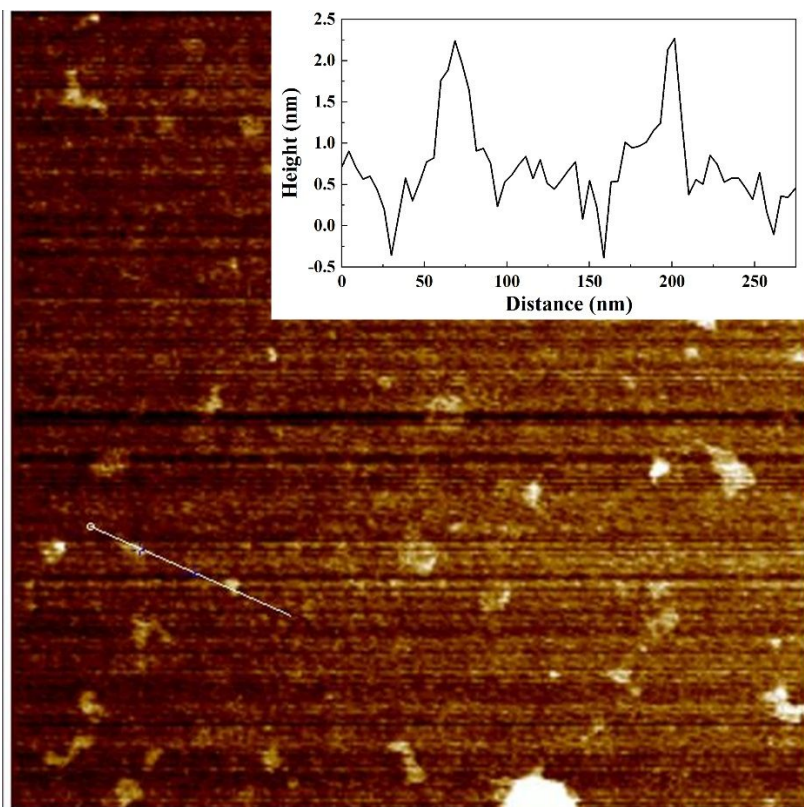

Figure S1 AFM images of the F-CDs and the height distribution.

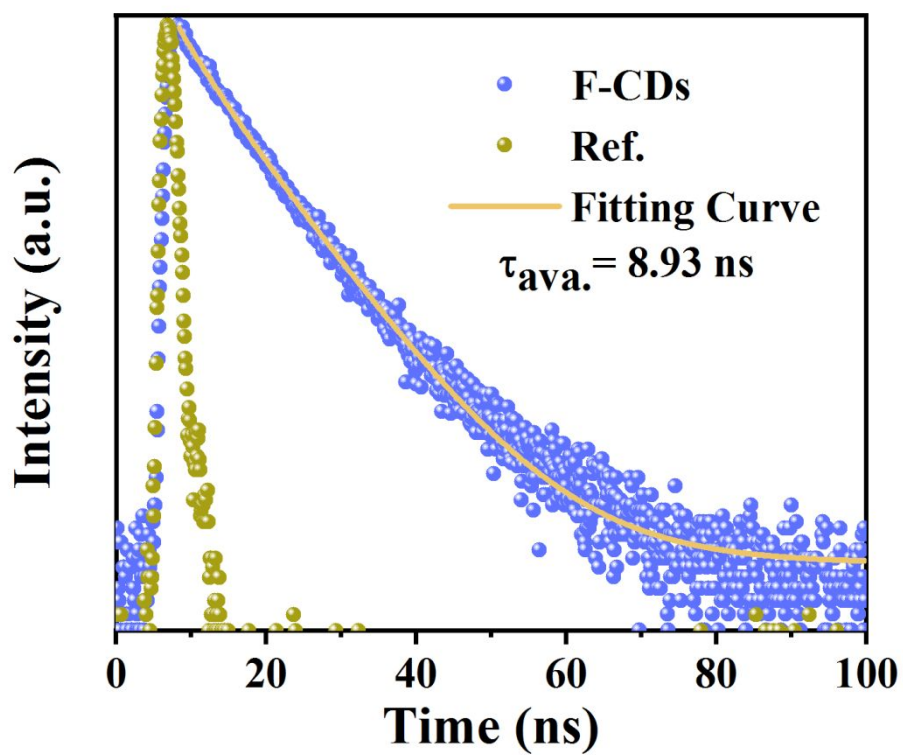

Figure S2 Fluorescence lifetimes of F-CDs.

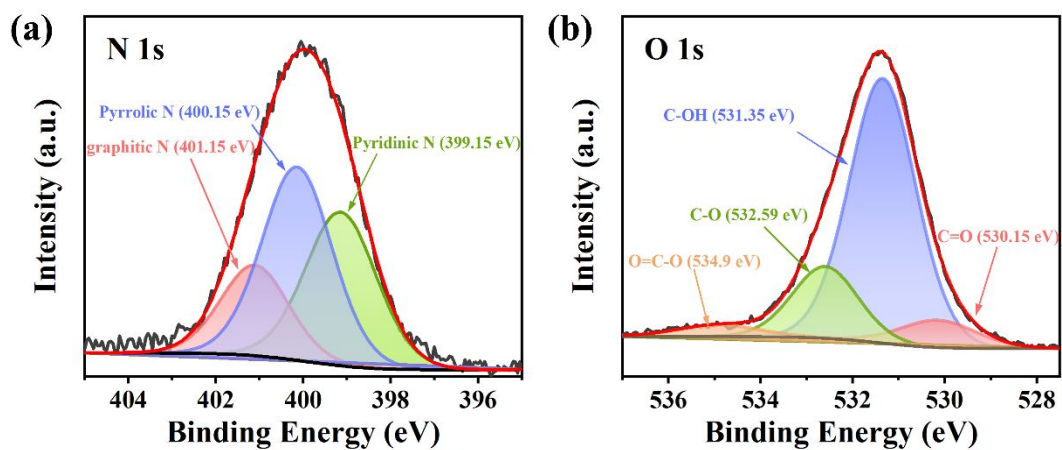

Figure S3 (a) and (b) High resolution spectra of N 1s, and O 1s.

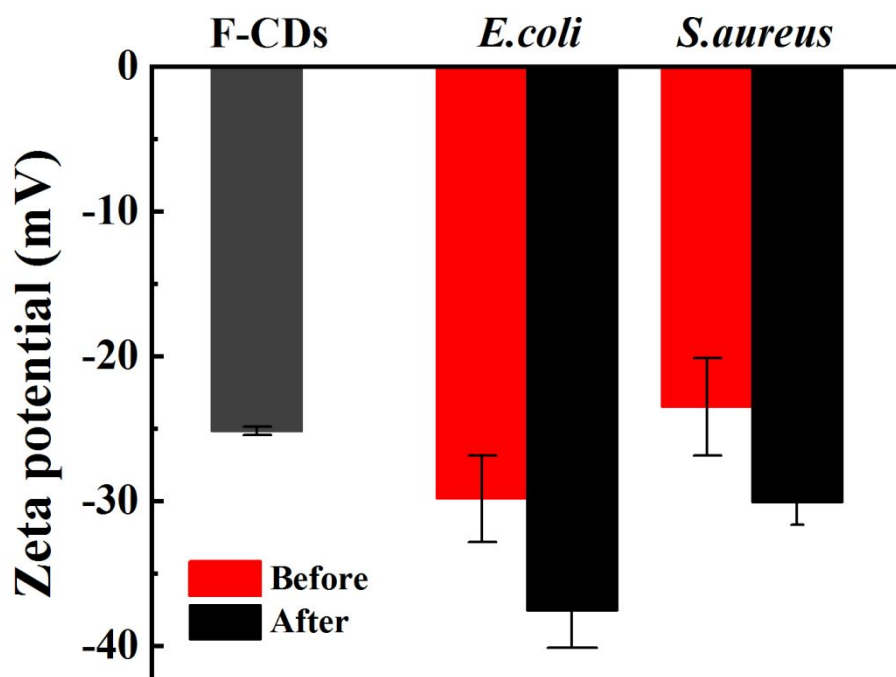

Figure S4 Zeta potential of F-CDs, *E. coli* and *S. aureus* before and after treating with F-CDs.

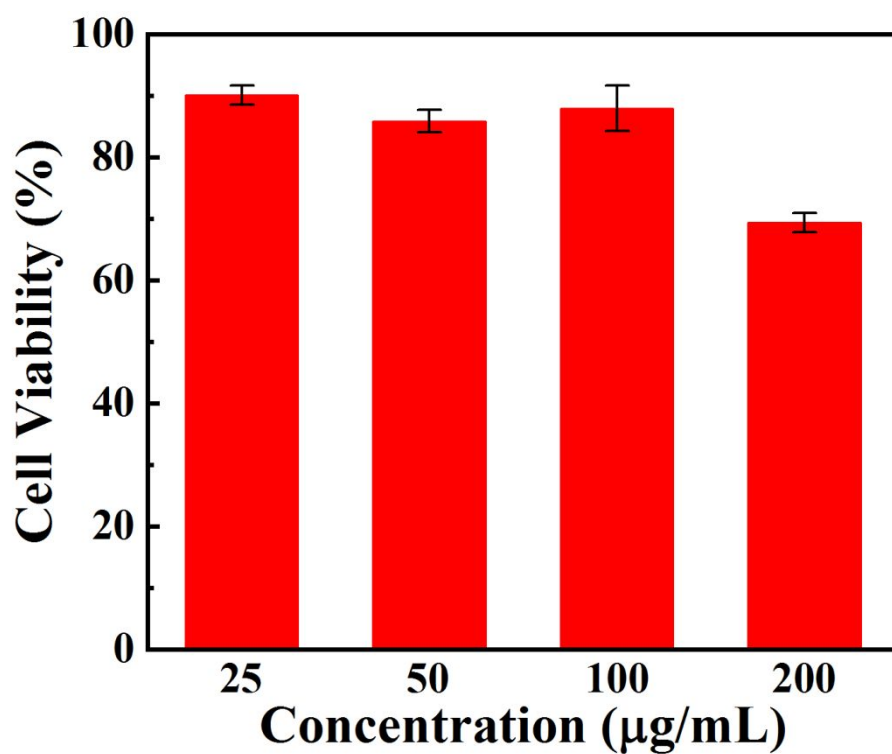

Figure S5 Cytotoxicity of F-CDs for Human epithelial kidney cells, 293T.

|               | Bacterial strains    | MIC (µg/mL) |
|---------------|----------------------|-------------|
| Gram-negative | <i>E. coli</i>       | 64          |
|               | <i>P. aeruginosa</i> | 128         |
| Gram-positive | <i>S. aureus</i>     | 64          |
|               | <i>B. subtilis</i>   | 128         |

Table S1 MIC of *E. coli*, *P. aeruginosa*, *S. aureus*, and *B. subtilis*.
